# Supplementary material
Source: MDPI journal article supplement (https://www.mdpi.com/2072-4292/14/16/3860)
Supplement: s1 [file s1 › remotesensing-1827639-supplementary.pdf]

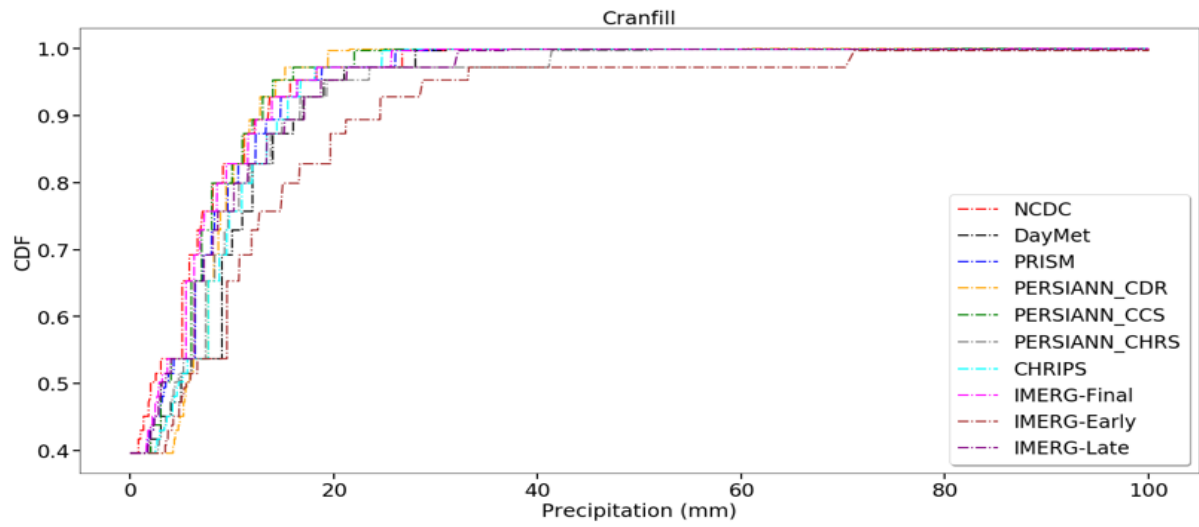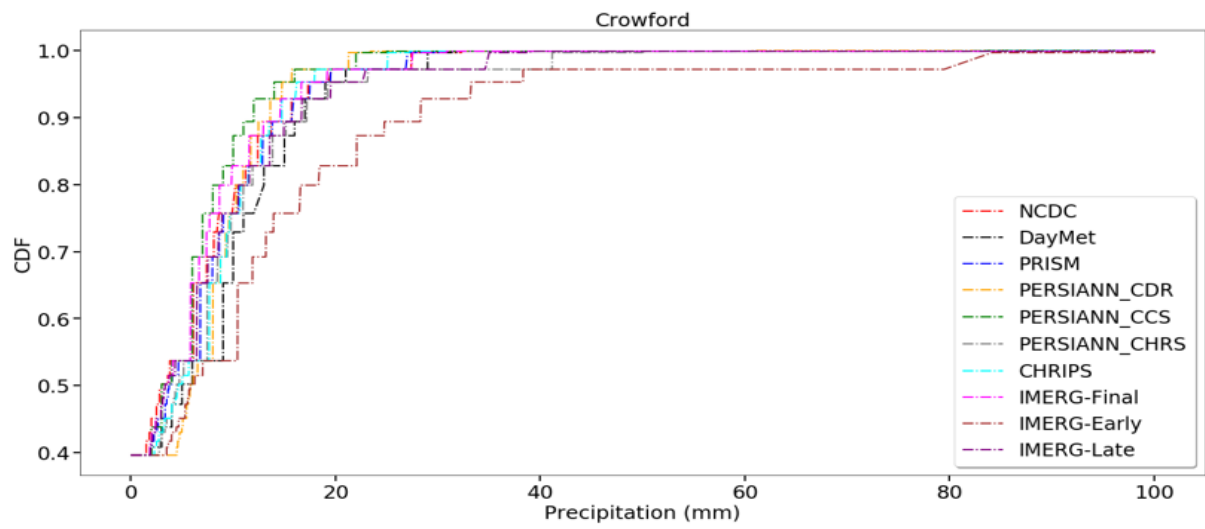

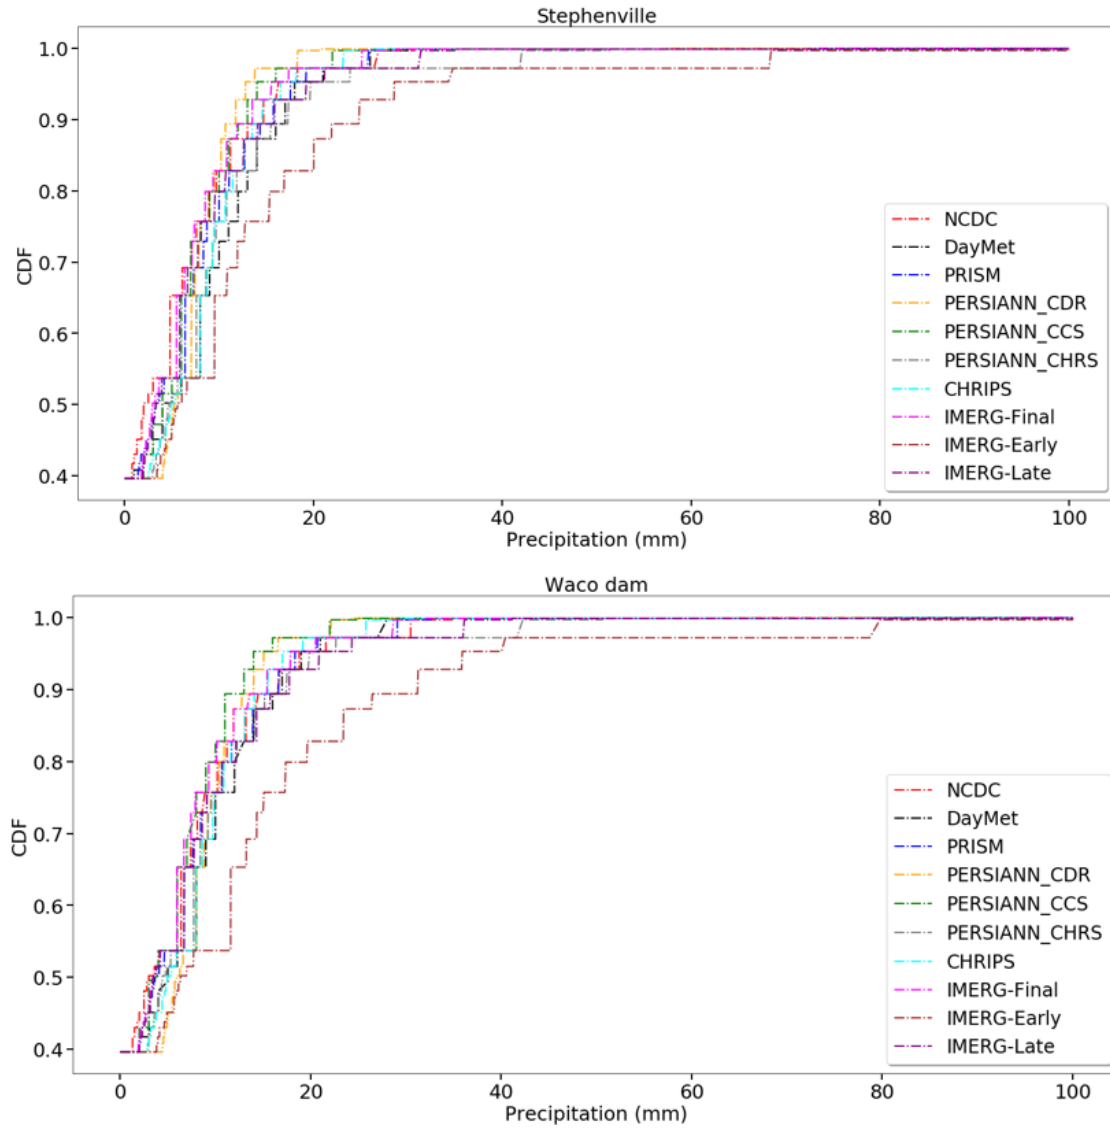

**Supplementary Figure S1.** Cumulative Distribution Function compares daily in situ precipitation with gridded precipitation datasets in the upper, middle, and downstream courses of the Bosque watershed.
